# Supplementary material for: A novel grain restraint strategy to synthesize highly crystallized Li4Ti5O12 (∼20 nm) for lithium ion batteries with superior high-rate performance
Source: Royal Society of Chemistry journal article supplement (doi:10.1039/c2jm31066j), 2012-01-01
Supplement: c2jm31066j.pdf [file c2jm31066j.pdf]

***Electronic Supplementary Information for***

**Novel grain restraint strategy to synthesize highly crystallized  $\text{Li}_4\text{Ti}_5\text{O}_{12}$  (~20 nm) for lithium ion batteries with superior high-rate performance**

Zhimin Liu,<sup>a,b</sup> Naiqing Zhang<sup>a,c</sup> and Kening Sun<sup>\*a,c</sup>

<sup>a</sup>Academy of Fundamental and Interdisciplinary Sciences, Harbin Institute of Technology, Harbin, 150001, China.

<sup>b</sup>Department of Chemistry, Harbin Institute of Technology, Harbin 150001, PR China.

<sup>c</sup>State Key Laboratory of Urban Water Resource and Environment, Harbin Institute of Technology, Harbin, 150090, PR China.

---

\*To whom correspondence should be addressed. E-mail: [keningsun@yahoo.com.cn](mailto:keningsun@yahoo.com.cn).

**Table S1.** Rietveld refinement of XRD data for NC-LTO calcined at 750 °C.

|                           |                 |                                                 |        |        |           |                  |
|---------------------------|-----------------|-------------------------------------------------|--------|--------|-----------|------------------|
| Formula                   |                 | Li <sub>4</sub> Ti <sub>5</sub> O <sub>12</sub> |        |        |           |                  |
| Crystal system            |                 | Cubic spinel                                    |        |        |           |                  |
| Space group               |                 | <i>FD-3m</i>                                    |        |        |           |                  |
| Site                      | Atom            | x                                               | y      | z      | Occupancy | B/Å <sup>2</sup> |
| 8a                        | Li <sub>1</sub> | 0                                               | 0      | 0      | 1         | 1.78(36)         |
| 16d                       | Li <sub>2</sub> | 5/8                                             | 5/8    | 5/8    | 0.1661    | 1.78(36)         |
| 16d                       | Ti <sub>1</sub> | 5/8                                             | 5/8    | 5/8    | 0.8333    | 0.88(11)         |
| 32e                       | O <sub>1</sub>  | 0.3882                                          | 0.3382 | 0.3882 | 1         | 0.98(5)          |
| Cell parameters           |                 | a = 0.8355 nm                                   |        |        |           |                  |
| <i>R</i> <sub>wp</sub> /% |                 | 9.1                                             |        |        |           |                  |
| <i>R</i> <sub>p</sub> /%  |                 | 8.7                                             |        |        |           |                  |

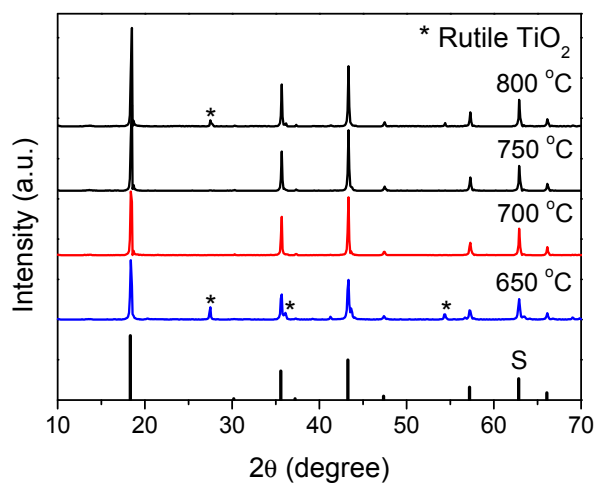

**Fig. S1** XRD patterns of the standard spinel  $\text{Li}_4\text{Ti}_5\text{O}_{12}$  (JCPDS Card No. 49-0207, noted as S) and the samples calcined at different temperatures in air.

**Table S2.** Comparison of rate performance for NC-LTO synthesized in this work with  $\text{Li}_4\text{Ti}_5\text{O}_{12}$  reported in other literatures.

| Material                                                            | Capacity ( $\text{mAh g}^{-1}$ ) |      |      | Reference     |
|---------------------------------------------------------------------|----------------------------------|------|------|---------------|
|                                                                     | 1 C                              | 10 C | 20 C |               |
| NC-LTO                                                              | 168                              | 155  | 139  | In this paper |
| N doping $\text{Li}_4\text{Ti}_5\text{O}_{12}$                      | 161                              | 129  |      | 10            |
| $\text{Li}_4\text{Ti}_5\text{O}_{12}$ /carbon nanotube              | 159                              | 136  | 123  | 11            |
| Nb doping $\text{Li}_4\text{Ti}_5\text{O}_{12}$                     | 169                              |      | 118  | 12            |
| Ag doping $\text{Li}_4\text{Ti}_5\text{O}_{12}$                     | 150                              |      |      | 13            |
| $\text{Li}_4\text{Ti}_5\text{O}_{12}$                               | 80                               |      |      | 14            |
| Crystalline $\text{Li}_4\text{Ti}_5\text{O}_{12}$ nanostructure     | 160                              | 120  | 100  | 15            |
| $\text{Li}_4\text{Ti}_5\text{O}_{12}$ nanoparticle                  | 150                              | 104  |      | 16            |
| $\text{Li}_4\text{Ti}_5\text{O}_{12}$ nanoparticle                  | 140                              | 100  |      | 17            |
| Ordered macroporous $\text{Li}_4\text{Ti}_5\text{O}_{12}$           | 155                              |      |      | 18            |
| $\text{Li}_4\text{Ti}_5\text{O}_{12}/\text{TiO}_2$ nanocomposites   | 162                              | 135  |      | 19            |
| Microscale spherical $\text{Li}_4\text{Ti}_5\text{O}_{12}/\text{C}$ | 162                              | 110  |      | 20            |
| $\text{Li}_4\text{Ti}_5\text{O}_{12}/\text{C}$                      | 150                              | 130  | 120  | 21            |
| $\text{Li}_4\text{Ti}_5\text{O}_{12}/\text{C}$                      | 150                              | 129  |      | 22            |

**Table S3.** Impedance fitting results of NC-LTO and Bulk-LTO electrodes.

| Sample   | $R_e$ | CPE    |       | $R_{ct}$ | $Z_w$ |
|----------|-------|--------|-------|----------|-------|
|          |       | $Y_0$  | $n$   |          |       |
| NC-LTO   | 5.1   | 4.9E-5 | 0.894 | 24.9     | 0.037 |
| Bulk-LTO | 5.8   | 5.1E-5 | 0.906 | 150.6    | 0.028 |

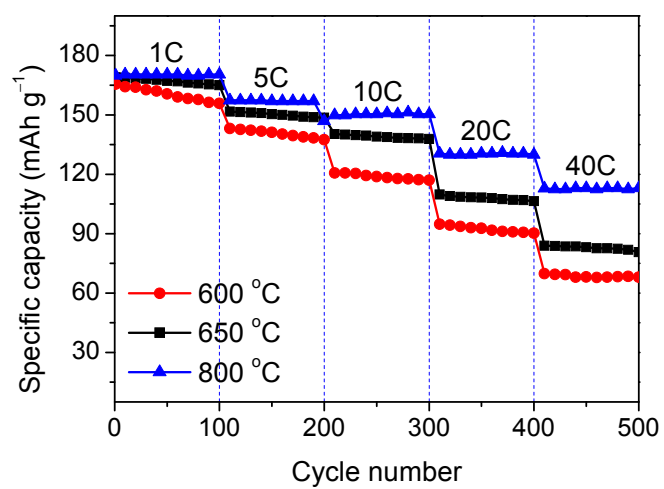

**Fig. S2** Plots of discharge capacity versus cycle number for  $\text{Li}_4\text{Ti}_5\text{O}_{12}$  calcined at 650 °C, 700 °C and 800 °C at different current rates (1 C, 5 C, 10 C, 20 C and 40 C).
